# Supplementary material for: In Vitro Analysis of Metabolites Secreted during Infection of Lung Epithelial Cells by Cryptococcus neoformans
Source: PLoS One. 2016 Apr 7;11(4):e0153356. doi: 10.1371/journal.pone.0153356 (PMC4824519; doi:10.1371/journal.pone.0153356)
Supplement: S1 Dataset — (XLSX) [file pone.0153356.s001.xlsx]

## Sheet: Sheet1
		Group	Lactic acid	Glycolic acid	L-valine	2-methoxyimino-3-methyl-butanoic acid	Glycine	4-hydroxybutyric acid	3-hydroxyisovaleric acid	2-hydroxyisocaproic acid	Urea	L-leucine	L-isoleucine	Succinic acid	2,3-hydroxypropanoic acid	2,4-dihydroxypyrimidine	Fumaric acid	L-serine	L-threonine	Beta-alanine	3-amino-2-piperidone	3-hydroxy-3-methylpentanoic acid	Malic acid	L-pyroglutamic acid	L-aspartic acid	4-hydroxy L-proline	Creatinine	L-cysteine	DL-3-phenyllactic acid	L-phenylalanine	L-glutamic acid	D-gluconic acid	L-asparagine	d-xylose	Xylitol	Adonitol	Ribonic acid	L-ornithine	5-(1H-Benzimidazol-2-ylmethylene)-2,4,6(1H,3H,5H)-pyrimidinetrione	Citric acid	Sorbypyranose	D-fructose	Hydroxyphenyllactic acid	Glucopyranose	d-mannose	L-lysine	L-tyrosine	d-galactose	D-mannitol
1	MOI10_6hrs	1	47.2931		8.36784		3.12069				22.956	15.1066		1.11362	0.0493092				7.60985		4.3921		0.209365	12.6224	3.40377	2.70293		9.4888			21.5383		3.6588		2.18423			0.937068		3.95353		20.2684			62.8699			12.6505	7.47413
2	MOI10_6hrs	1	20.9982		1.01775		2.22489	0.123009				0.685321	13.1583	0.969919	0.0540211				0.357335		2.52553		0.199679		2.08359	3.49739		9.31539			11.606		1.34814		1.48105			1.6252		2.72024		11.3408						1.8114	3.5508
3	MOI10_6hrs	1	18.2555		0.87583		0.61595				10.0737	2.18696	13.2538	0.316028	0.0225323				0.359161		1.35599		0.092281		0.889789	1.61239		3.64396			6.61817		0.852329		1.22663			0.274051				1.43123						3.0328	0.975774
4	MOI10_6hrs	1	51.9199		5.76896		8.42212	0.553293				5.31108	10.3541	3.32911	0.246004				5.33211		1.10463		0.578335		7.93463	10.0175		11.8777			24.4847		6.81909	6.24111	1.79763			5.51837			1.40045	45.2788			124.791			11.263	17.7707
5	MOI10_6hrs	1			1.07969																							5.08434							1.11219
6	MOI10_6hrs	1									6.45758		6.19388											20.2719											0.610617										31.9963
7	MOI10_6hrs	1	52.7601		2.92148		4.77713	0.414465				2.02935	2.01841	2.20011	0.191547				3.73622		1.35057		0.521382		5.21477	5.11044		11.601			18.0519		4.29551	38.0345	2.48514			5.57242			1.45067	26.5368			72.1967			7.78156	10.6737
8	MOI10_6hrs	1	1.56406		0.203263						0.220478		6.32558															4.39025			1.03636
9	MOI10_6hrs	1	51.6705		5.14083		7.13138					7.12627	25.3249	2.98292	0.248162				5.0364		3.5946		0.589468		7.33497	8.54086		11.5557			25.0629		6.57075	29.3084	2.22252			3.68672			1.01903	39.4822			61.2029			10.6106	17.2497
10	MOI10_6hrs	1	28.6629		3.55937		3.21744	0.194052			5.94694	5.56309		1.29068	0.0856307				3.9357		1.95976		0.222401		3.33023	3.15271		7.84028			11.6458		2.38915	8.1026	0.570854			2.28748		2.6874	0.266991	15.7166			20.354			4.67197	7.13093
11	MOI10_6hrs	1	24.7586				2.13733				3.23992	6.84999		0.877864	0.0468806				3.82881		0.956368		0.143881	6.52948	2.37625	1.88277		5.36668			8.82113		1.79206	5.57894	0.560506			0.741588		0.524399	0.198445	10.5857			25.8976			5.57185	4.08052
12	MOI10_6hrs	1	95.572		5.57801		7.75086	0.474293				5.4068	9.84767	3.29279	0.246695				4.39964				0.527331	40.5736	5.71645	8.71181		11.0735			23.0004		4.85452	108.724	0.973326			5.16784			3.71773	47.5657			215.038			25.4849	18.494
13	MOI10_12hrs	2	5.61424								12.4875		11.4931								1.10427		0.0885804					2.55495			1.66947				1.28963					3.16404				2.49717			3.57946
14	MOI10_12hrs	2	258.983		18.8439		13.4929				6.94447	30.8764	51.3768	7.24314					12.5034		7.38794		1.53514	59.1979	13.7354	17.2849		23.613			52.1824	1.97183	6.95326		2.22516	1.44958		10.133			3.1376	156.202		46.7231	131.294		10.0877		32.6971
15	MOI10_12hrs	2	139.229		2.19488		7.79036	1.28271			14.0848	1.2574	13.6074	4.98636	0.336648				4.25706		3.02763		1.23801	39.8636	7.5897	10.7264		15.136			29.6639		4.57492		1.83554	1.10093		13.7162			2.99853	99.3633		50.6568	30.6998		7.17206		24.9213
16	MOI10_12hrs	2	40.5869		1.3077		0.755811					5.21682	5.9469	0.485869					0.783556				0.187828	17.5145	0.126977	1.3004		4.6858			6.95944		0.049322			0.719457					0.714237	17.8788		16.2721			2.29435		2.59225
17	MOI10_12hrs	2	111.823		6.08122							4.277	21.4032						1.15114		1.75821		0.138095	2.49161				9.35332			9.70579	0.82296			0.847312	0.686181						19.1188		6.26871			4.39509
18	MOI10_12hrs	2	287.948		2.64377		0.414944				16.1262	8.04733	20.8368	1.86753					3.06731		1.80287		0.490118	47.0483		2.82917		5.3286			10.9507	0.735075			1.08461	0.680057					0.505207	57.5661		14.3378	13.4116				9.11088
19	MOI10_12hrs	2	69.9321				6.15171	0.425375				0.987624		2.62572	0.247653		0.354996				0.163387		0.902368		4.68368	7.40995		12.9397			24.0615		3.53036		1.65502	1.11482		5.47055			0.747173	65.212		37.1946			6.20957		12.8866
20	MOI10_12hrs	2	37.2239		1.8332		2.07526					0.135076	8.84587	0.899434	0.0984179		0.186632		0.321955		0.313539		0.399039		1.66546	3.33616		7.15354			10.8243		0.712414					1.91224				27.8023		14.2689			3.53793		3.81256
21	MOI10_12hrs	2	72.0837								6.9403		8.55414								1.92735		0.0672017					1.49144			4.48983	0.585793				0.727976						1.96672		16.9069			2.6349
22	MOI10_12hrs	2	159.97		9.53618		8.60157				15.2915	21.6138	31.7048	3.56965					8.75472		1.50611		0.907296	28.534	7.79889	9.39357		13.5379			34.0312		5.00355		0.759732	2.16117		3.67377		4.39507	1.01562	93.5877		18.2748	59.7387				19.3611
23	MOI10_12hrs	2	46.0549		1.67252		3.08526	0.200019			5.37658	2.35804	8.79193	1.38267	0.103899				1.90988				0.438132	11.1033	2.67689	3.81227		7.31327			13.8267		2.1167		0.0492581	0.573604		2.19963		1.25937	0.122152	37.9711		8.06934			3.09859		7.09685
24	MOI10_12hrs	2	171.86		3.87277		11.3695	0.799027				5.79842	9.97115	5.21076	0.349989				6.41192		1.70863		1.15678	54.9234	8.44619	13.0798		15.8754			38.9112		5.98099		0.694532	2.25534		8.40743			3.51647	119.145		40.0984	71.5122		6.41902		27.5586
25	MOI10_18hrs	3	22.1397						0.34114		10.3702		8.10394		0.00525527		0.286688				2.28763		0.486321					0.653292							0.745727					3.83586						15.0638	6.95259
26	MOI10_18hrs	3	13.8683								6.65269		4.91987		0.00627404		0.16112				0.719609		0.33631					4.30989							0.449091					2.39739						8.94778	4.13087
27	MOI10_18hrs	3	15.0033						0.149107		4.68757		3.54815		0.0267495		0.120353				0.677891		0.27084					1.28637							0.31926			0.211753		1.7238						6.26623	2.94597
28	MOI10_18hrs	3	92.6396		5.53074		5.56014	0.477374	0.343744		11.9616	9.55186	9.63746	2.62698	0.156511				4.43376		0.965116		0.874483	30.2738	0.453951	6.4705		7.38548	0.972504		14.603		3.39843					4.05624	7.01457	3.49321						13.8325	6.44606		11.2027
29	MOI10_18hrs	3	17.4085		2.38353				0.220555		7.60792		9.05504										0.0685951					4.80288							0.428554				5.15211							9.2881	4.47313
30	MOI10_18hrs	3	18.1645					0.362409	0.148542				5.32429										0.137281	14.3374				3.08417	0.49684						0.289341											6.03157	3.02127
31	MOI10_18hrs	3	50.6032				2.35367	0.172529	0.325086		13.807			1.2184	0.0928054								0.751714	28.3713		3.15282		6.75237			6.79343				0.560407			0.921503		3.80674						13.1328	5.97218		2.50579
32	MOI10_18hrs	3	31.4316		2.11829		0.664304		0.206111		6.72101	2.56683	8.992	0.449219	0.0102386				1.48014				0.36147	19.0972		1.20247		4.49612			3.93246								4.736	2.25655						8.57346	3.93045
33	MOI10_18hrs	3							0.153344		4.81488						0.121614						0.115959					0.340642																		6.44315	3.00027
34	MOI10_18hrs	3	105.41		5.91092		6.89606	0.586254			8.13963	2.33889	9.73301	3.66371	0.239392				5.49175		2.65268		1.19007	23.4097	0.516366	7.76513		8.93589			15.7819		2.81637					10.2125								17.824	8.55454		15.2484
35	MOI10_18hrs	3	37.6272		1.97042		2.0165	0.202661	0.209425		1.18739			1.15951	0.1131		0.172743		0.750133		0.536939		0.497553			2.21212		4.37364			5.2237		0.118986					4.06181	4.1148	0.74447						8.55579	4.08067		3.92339
36	MOI10_18hrs	3	11.4817						0.136222						0.0148812		0.116459				0.87875		0.191358					2.69496										0.600099		1.26622	0.198259					5.59048	2.73959
37	MOI100_6hrs	4	10.065		0.0358292						4.4996		15.4237				0.348253				1.14645		0.807048					6.84444							1.52249		0.437531		7.53616							12.5433	6.59714
38	MOI100_6hrs	4	4.66419								2.08162				0.00394628		0.225911	4.28391			0.710863		0.603263					8.79824			0.759366				1.03941					1.80179						7.91379	4.20478
39	MOI100_6hrs	4	122.962		7.00521		4.51249					14.0417	24.5127	2.94242					5.99781		2.39725		1.05681	20.4019	3.31521	6.00913		12.6006			12.9891		1.2607		1.14511			2.00914			1.21695	32.69		13.7182		10.8698	6.7834		11.7406
40	MOI100_6hrs	4	58.7977		4.92853		4.02972					10.915	11.7932	1.99347							0.394323		0.788764	25.0775	2.18238	3.90643		10.9198			9.68248		1.03093		0.116837	0.30786	0.36168	1.35354			1.51842	25.3215		10.6809		10.0335	5.35651		9.088
41	MOI100_6hrs	4			1.46848						1.93686		7.56599				0.205095						0.249595					7.0224							1.13603				3.23026							6.19104	3.33933
42	MOI100_6hrs	4						0.175413			1.60593		4.84637					0.242233			0.34173			0.518031				3.05446				0.118353			0.477406	0.164963	0.13676									2.13434	1.70499
43	MOI100_6hrs	4									0.239257													8.66238				2.34333							0.268046									1.73951		0.934739	1.06745
44	MOI100_6hrs	4	2.60635								1.34607		3.67808					0.501285					0.335242	1.56489				5.08561				0.140026				0.215409			1.10641							2.15066	1.88637
45	MOI100_6hrs	4	20.4004		3.42176		1.15241					1.41579	13.4387	1.39569	0.13544		0.399732		2.95854		1.01974		1.28888			1.10403		10.7699			8.29177		1.48305		0.553826	0.65464				0.020578		18.912		5.57598		9.91912	6.20934		7.57239
46	MOI100_6hrs	4	60.0773		4.18025		6.43274	0.424671				6.16419	16.2037	3.31057	0.243681		0.442882		3.40513				1.52057	17.2773	3.22447	6.30389		15.1329			14.7553		3.77597		1.02471		0.538913	2.76444	7.22413		1.51422	43.364		5.93821		13.7728	7.25278		15.909
47	MOI100_6hrs	4	106.568		6.99781		11.2163	0.857034				9.82327	19.7389	5.7385	0.424032		0.598408		9.15956		1.15617		0.416879	35.6352	7.93087	11.3646		21.588			25.5249		8.69581		1.61925			7.96572	10.5157		2.01544	80.0293		10.5278		19.182	10.6303		27.7097
48	MOI100_6hrs	4	20.6156		0.541394		0.897145							0.815526	0.0579388		0.200991						0.584728			0.350234		8.05652			3.50511		0.0669755		0.164402			0.186674	4.08259		1.11746	7.16376		5.97074		6.68443	3.78889		3.0876
49	MOI100_12hrs	5	64.1574		5.66609				2.39898		7.79955	5.06458	25.7326	1.10887			0.820318		5.43714		2.25973		1.03727	3.28877				2.93738	0.731198			0.936046			0.735775					1.45938						19.9252	10.2147		0.229645
50	MOI100_12hrs	5	74.4987						1.38681		5.27952	4.28934	15.2058	0.778152					1.2245		1.51543		0.77852	1.24502				4.95054							0.356475					1.19235						10.2397	5.95057
51	MOI100_12hrs	5	272.043						1.09224		4.168		5.63133	0.891076	0.0755075		0.274725				0.520078		0.830918	3.01399		0.591693		2.67403							0.429902					1.51329						9.41951	4.80579		0.591231
52	MOI100_12hrs	5	87.9475		3.92228		2.02422	0.265238	1.33511		5.16318	6.10519	7.48181	2.07162					4.11138		0.649533		0.97419	22.5811		2.99886		4.59625	0.396332		2.69696		1.37654			0.836038		0.702863	2.43653	1.29194						8.47353	5.64234		6.36372
53	MOI100_12hrs	5	8.35836		1.34654				0.959381		3.79261		6.99776				0.249071						0.251671					3.30286	0.313853						0.289541	0.505228										6.85743	4.17991
54	MOI100_12hrs	5	25.5501					0.327711	0.812433		2.8369		7.80918				0.235156				0.91554		0.32152	14.0398				2.61259	0.258738			0.226938			0.243082	0.368638										4.05011	3.28118
55	MOI100_12hrs	5	100.658		5.9549		3.17455	0.438848	2.2195		4.78965	9.2228	9.20521	2.84561			0.580256		7.49924		0.335656		1.73425	35.9882		4.70446		7.51572	0.710265		3.28467		2.7969		0.734345			0.518282	5.6338	2.6972						16.3535	9.86962		6.1492
56	MOI100_12hrs	5	22.0913		2.56574		1.35665	1.09651	1.38277			0.321795	8.73621	1.38716	0.107034	0.191885	0.357322		2.54046				1.11453			1.84097		5.01328	0.442584		0.0294953		0.12707					0.609498		1.88761						12.1104	6.41994		2.45651
57	MOI100_12hrs	5	42.8128		1.84759				1.14591		4.54141	1.46318	11.7387						1.9216		1.37669		0.635151					0.451027	0.34939							0.524929										6.12703	4.86356
58	MOI100_12hrs	5	81.7726		5.05719		2.35331		1.86743			2.81639	13.1227	2.82867	0.210199		0.464101		4.05176		1.10875		1.73341	12.6286		2.56325		5.00884			2.48394		1.14305					4.63431	3.73943	2.26078						12.8136	8.15343		8.73842
59	MOI100_12hrs	5	30.418		3.06319		1.83771	0.274422	1.24215			0.629751	6.96093	1.77343	0.12862	0.167399	0.316175		2.52008		0.144242		1.07442	7.42391		1.57911		4.84188	0.52033		1.90365		1.03953					1.57203		0.401185						11.0267	6.11715		5.51485
60	MOI100_12hrs	5	9.38124						0.904101		3.12729			0.689086	0.0430704	0.117446	0.225971				0.391436		0.681261					3.51206	0.402176										2.92843	1.47954						7.6062	4.20376		0.0599642
61	MOI100_18hrs	6		0.218334						0.307217	1.93299		6.43943				0.518316			0.144355	0.701949		1.11253				1.02249		2.66724	2.41855					0.214306					2.01013			1.15616			10.3846	6.9354
62	MOI100_18hrs	6	8.73824	0.168862					4.36108		1.19824		6.04682	0.316305	0.0157649	0.15947	0.36039			0.169947		0.314823	0.981349				0.833484	0.76801	1.91416	1.64568					0.168027					1.66709			0.846199			7.7526	5.17312
63	MOI100_18hrs	6	32.5686			0.320491		0.713812	5.21059	0.259475	1.47433		5.0542	1.85578	0.161337	0.180273	0.440797		0.168022	0.22189	0.489961		1.46036	5.0107		1.03494	2.1763		2.3995	2.06167					0.267111	0.592418		0.163979		2.47323			1.03554			8.43548	6.0719		3.63448
64	MOI100_18hrs	6	18.1471					0.11495	3.03501	0.155028	0.962036		0.517125	0.643181	0.0391351		0.271772		0.885389				0.689207	12.0726				1.10845	1.36226	1.28925						0.430841				1.05072			0.485011			5.04	3.71068		0.331537
65	MOI100_18hrs	6	29.0533		1.38995	0.52095		0.192902	7.69413		3.00274		11.0211	1.27606	0.0710164	0.284077	0.629075			0.335449		0.611868	1.88809				3.03013		3.39112	2.99225					0.437815	1.06103			4.20536				1.61879			13.333	9.40533
66	MOI100_18hrs	6	18.6154						4.79338	0.244123	1.23007		5.52138	0.630513	0.0482725	0.185992	0.392955			0.19689	0.499389		1.22089	17.694			1.97341		2.0763	1.84466					0.293219	0.755173							0.948018			8.30063	5.79322
67	MOI100_18hrs	6	5.4587			0.215448			3.49412		0.89371					0.133156	0.289919			0.134957		0.249264	0.707125	13.1529			0.56955	0.658311	1.47854	1.31457					0.212066	0.433939			1.90771	1.41519			0.727987			5.55376	4.19092
68	MOI100_18hrs	6	33.703		1.96294			0.353734	5.01304		1.42036		9.82558	1.66986	0.0918885		0.416264		3.56823		0.0477039	0.368795	1.25425	19.5634		1.50412	0.87129	1.0302	2.09223	2.07854						0.907403			3.54865	2.07578			0.882065			9.0143	6.04012		1.25647
69	MOI100_18hrs	6		0.104659		0.255776			3.86529	0.198604	2.1601					0.149522	0.308016			0.170795		0.296913	0.859976				0.783459		1.6964	1.47429						0.583463			2.80356				0.770257			7.2301	4.80625
70	MOI100_18hrs	6	78.2459		1.58088			0.614221	7.38883				8.75336	3.70397	0.234611		0.666369		3.3979	0.143121	0.374681	0.525556	2.12306	13.1102		3.45369	2.87424		3.31816	2.82055						0.778485		1.34798	2.77778	3.50043			2.20094			11.0802	8.06663		11.6834
71	MOI100_18hrs	6	45.1205		2.03224			0.284447	4.11139	0.212408			7.64719	1.72478	0.102928		0.355962		3.42617			0.301294	1.10141	4.62784		0.877252		1.51269	1.76396	1.678						0.464778			1.95141	0.505694			0.785227			6.69964	5.03417		4.17066
72	MOI100_18hrs	6	33.3647					0.331095	4.99339	0.175709	0.508147			2.10281	0.0829306	0.203571	0.41261			0.0799021		0.436798	1.4481	16.8836			0.525288	0.443029	2.30883	0.984913						0.380206			1.16965	1.90769			0.770441			5.92735	4.7659		0.95816
[truncated: 7 more columns]
